# Supplementary material for: Regulation of tomato fruit pericarp development by an interplay between CDKB and CDKA1 cell cycle genes
Source: PubMed Central journal article supplement — J Exp Bot. 2012 Jan 25;63(7):2605–17. doi: 10.1093/jxb/err451 (PMC3346228; doi:10.1093/jxb/err451), 2012-01-25
Supplement: supp_err451_00070532-file001.pdf [file supp_err451_00070532-file001.pdf]

**Supplemental table 1:** Sequences of the primers used for RT-PCR

Table2.

| Gene name or number   | Primer sequences                   |
|-----------------------|------------------------------------|
| TOM 51                | 5'- GCTGTGCTTTCCTTGTATGC-3'        |
| LeACT 2/7 (actin 2/7) | 5'- TCACACCATCACCAGAGTCC-3'        |
| Le S18                | 5'-GGACTCTGGTGATGGTGTAG-3'         |
| <i>Le CDKA1</i>       | 5'- CCGTTCAGCAGTAGTGGTG-3'         |
| <i>Le CDKB1</i>       | 5'- AGACGAACAACCTGCGAAAGC -3'      |
| <i>Le CDKB2</i>       | 5'- AGCCTTGCGACCATACTCC-3'         |
| TPRP-CDKB1 forward    | 5'-AACCCCTGAATAGAACCAAATG-3'       |
| TPRP-CDKB1 reverse    | 5'-GTATGTGCCGTGATTGTCTG-3'         |
| TPRP-CDKB2 forward    | 5'-ATGGAGAAATACGAGAAATTGGAG-3'     |
| TPRP-CDKB2 reverse    | 5'-ACGATGTAGAGAGAATGAGATAGC-3'     |
|                       | 5'-ATGCTGGTAAGAGTGTATCGG-3'        |
|                       | 5'-CGGAGAGTAGTTGGAGGAAC-3'         |
|                       | 5'-TCATTATATTTAACAATCCCACTTGATG-3' |
|                       | 5'-ACAGTGAAATATGAAAGTGACAAG-3'     |
|                       | 5'-TACATATTACATACCTAACTCAAGCATC-3' |
|                       | 5'-CGGAGAGTAGTTGGAGGAAC-3'         |

**Supplemental Figure 1.** Expression of the *uidA* (GUS) reporter gene in tomato fruits transformed with the *pTPRP:GUS* vector.

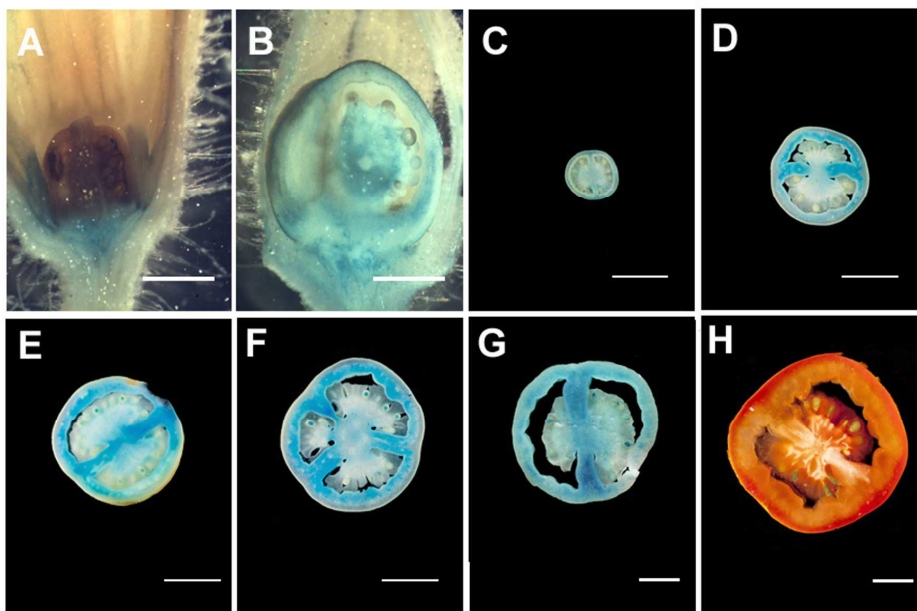

(A) Ovary in a flower bud before pollination. Bar = 1 mm

(B) Ovary 1 day after pollination. Bar = 1 mm

(C) to (H) Different development stages of a representative line expressing the *pTPRP:GUS* construct. Bars = 1 cm.

GUS staining was done for 3 hours.

**Supplemental Figure 2.** Postharvest characteristics of the fruits with *CDKB1* and *CDKB2* overexpression.

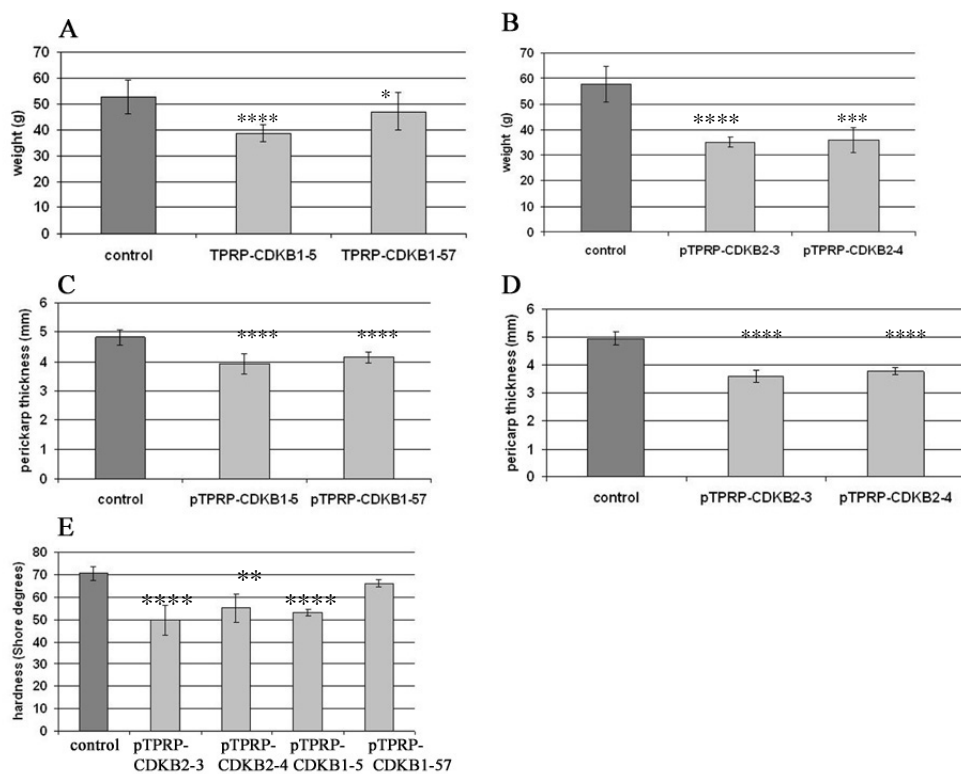

A, Mean weight of fruits from pTPRP-CDKB1 lines; B, Mean weight of fruits from pTPRP-CDKB2 lines; C, Pericarp thickness of fruits from pTPRP-CDKB1 lines; D, Pericarp thickness of fruits from pTPRP-CDKB2 lines; E, Firmness of fruits from pTPRP-CDKB2 and pTPRP-CDKB1 lines. Data are means of 10-12 ripe fruits from each plant  $\pm$  SD. Significant reduction of the parameter in the transgenic fruit compared to wild-type fruits is indicated with an asterisk \*\*\*\* $P < 0.0001$ , \*\*\* $P < 0.0005$ , \*\* $P < 0.005$ , \* $P < 0.02$ , no asterisk  $P < 0.17$

**Supplemental Figure 3.** Relative expression of CDKA1 in pericarp tissues of wild-type tomato M82 cultivar in different developmental stages. Bars are means of two biological replicas, each containing 3 different fruits.

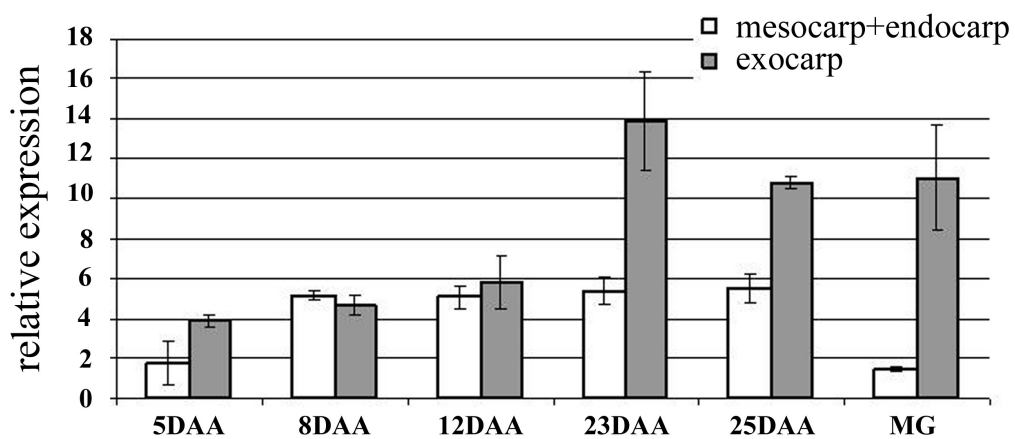

**Supplemental Figure 4.** Down-regulation of *CDKA1* in pTPRP:ami-CDKA1 transgenic lines.

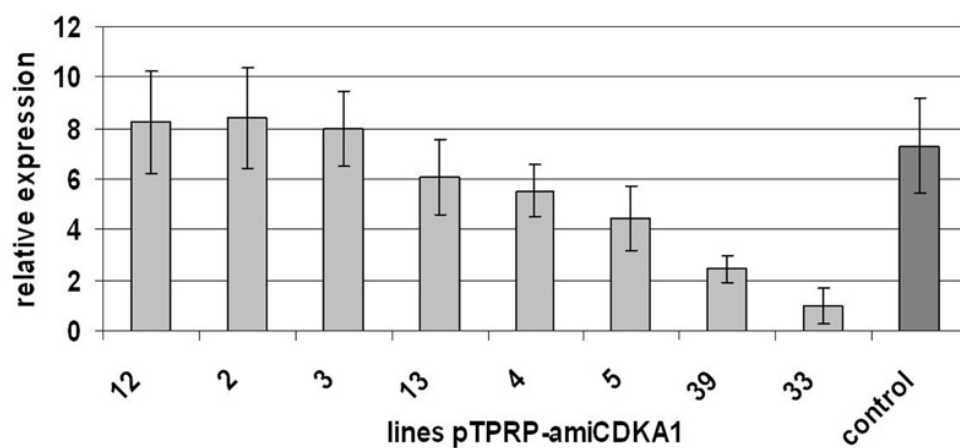

Fruits of the primary transformants (variety Ida Gold) were harvested at the mature green stage and the expression was determined by Q-RT-PCR analysis. Two biological replicates were taken and the standard deviation is indicated by a thin line. Transgenic lines #5, # 39 and #33 show a significant reduction in expression compared to control wild type fruits

**Supplemental Figure 5.** Characteristics of pTPRP-amiCDKA1 lines.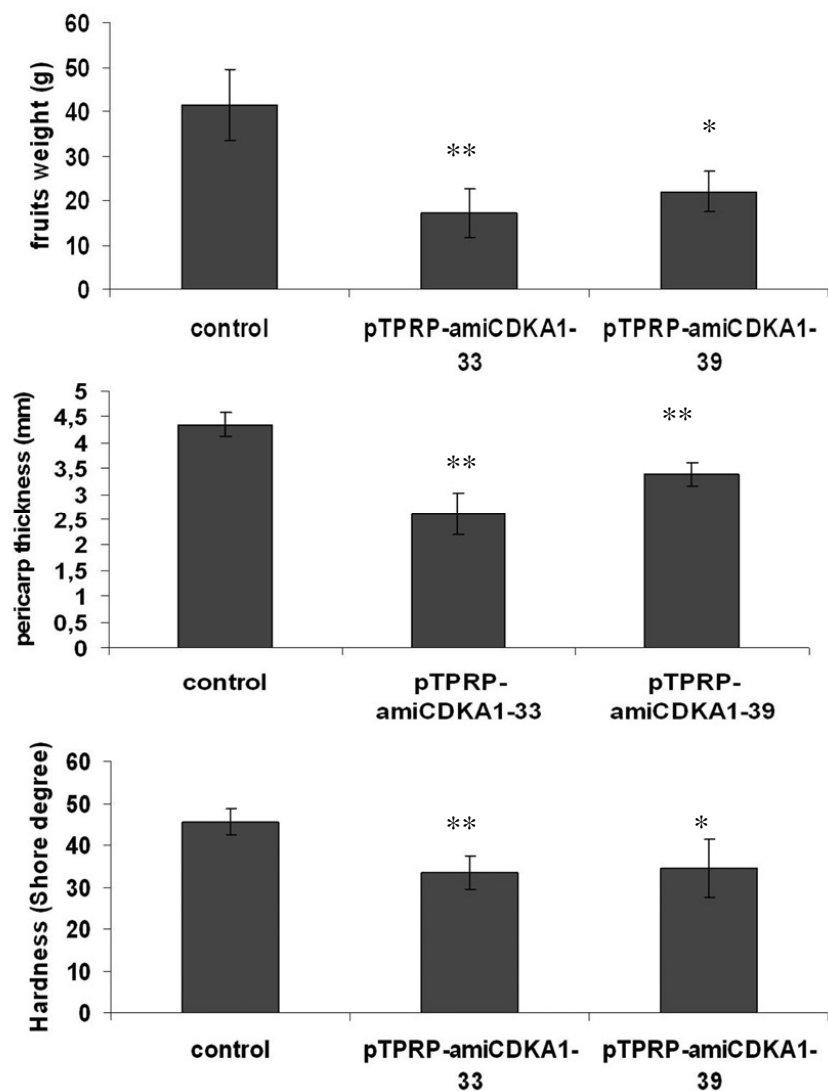

Data are means of 10-12 ripe fruits from each plant  $\pm$  SD. Significant reduction of the parameter in the transgenic fruit compared to wild-type fruits is indicated with an asterisk \*  $P < 0.002$  \*\*  $P < 0.0001$
